# Supplementary material for: Therapeutic Hypothermia in Low-Risk Nonpumped Brain-Dead Kidney Donors: A Randomized Clinical Trial
Source: PubMed Central journal article supplement (PMC10902731; doi:10.1001/jamanetworkopen.2023.53785), 2024-02-28
Supplement: jamanetwopen-e2353785-s002.pdf [file jamanetwopen-e2353785-s002.pdf]

## Data Sharing Statement

Patel. Therapeutic Hypothermia in Low-Risk Nonpumped Brain-Dead Kidney Donors. *JAMA Netw Open*. Published February 28, 2024. doi:10.1001/jamanetworkopen.2023.53785

### Data

**Data available:** No
